# Supplementary material
Source: PubMed Central journal article supplement (PMC2386765)
Supplement: 2008.950873_1.pdf [file 2008.950873_1.pdf]

## Supplemental Table ST1.

Summary of ultrastructural damage criteria used for subcellular compartments in this study

| Organelle      | Damage Criteria                                                                                                                                                                                                                                                                                                                                                                                                                                                                                                                                                                                                                                                                                                                                                                                            |
|----------------|------------------------------------------------------------------------------------------------------------------------------------------------------------------------------------------------------------------------------------------------------------------------------------------------------------------------------------------------------------------------------------------------------------------------------------------------------------------------------------------------------------------------------------------------------------------------------------------------------------------------------------------------------------------------------------------------------------------------------------------------------------------------------------------------------------|
| Mitochondria   | Swelling, disruption of inner and/or outer membranes, vacuolization, disorganization and/or >75% of mitochondrial area showing lack of cristae, or myelin figures within the matrix and/or associated with the inner and/or outer mitochondrial membranes.                                                                                                                                                                                                                                                                                                                                                                                                                                                                                                                                                 |
| Peroxisomes    | Focal loss of the unit membrane and/or decrease in intensity or “ghosting” of the granular matrix.                                                                                                                                                                                                                                                                                                                                                                                                                                                                                                                                                                                                                                                                                                         |
| Autophagy      | Three distinct stages of autophagy were observed and quantitated: <ol style="list-style-type: none"> <li>1. Autophagic vacuole – a double-membrane bound body containing organelles and/or cytoplasmic material sequestered for degradation.</li> <li>2. Autolysosome or Autophagolysosome – a later stage of digestion when an autophagic vacuole has fused with a primary lysosome containing acid hydrolases. Autolysosomes were observed with a thick single membrane and an enclosed moderate to dark granular matrix with areas of very electron-dense inclusions.</li> <li>3. Lipofuscin and residual bodies – late and final stages of autophagy, distinguished by a rounded or irregular shape with alternating electron-dense and lucent areas of undigested lipid and other residues</li> </ol> |
| Lipid          | Round, electron-lucent structures in the cell cytoplasm. The total area of lipid in the cell cytoplasm was measured and represented as a percentage of total cellular area (data not shown).                                                                                                                                                                                                                                                                                                                                                                                                                                                                                                                                                                                                               |
| Myelin Figures | Electron-dense, lamellar structures indicative of membrane injury. The total area of myelin figures not associated with mitochondria, peroxisomes, or autophagy was determined and expressed as a percentage of total cellular area (data not shown).                                                                                                                                                                                                                                                                                                                                                                                                                                                                                                                                                      |
| Nucleus        | Chromatin condensation and/or fragmentation, or formation of apoptotic bodies.                                                                                                                                                                                                                                                                                                                                                                                                                                                                                                                                                                                                                                                                                                                             |
| Nucleolus      | Fragmentation and separation of granular and fibrillar components.                                                                                                                                                                                                                                                                                                                                                                                                                                                                                                                                                                                                                                                                                                                                         |
